# Supplementary material for: In situ self-activation synthesis of binary-heteroatom co-doped 3D coralline-like microporous carbon nanosheets for high-efficiency energy storage in flexible all-solid-state symmetrical supercapacitors
Source: Royal Society of Chemistry journal article supplement (doi:10.1039/d0se00047g), 2020-01-01
Supplement: d0se00047g1.pdf [file d0se00047g1.pdf]

## Supporting Information

In-situ self-activation synthesis of binary-heteroatom co-doped 3D coralline-like microporous carbon nanosheets for high-efficient energy storage in flexible all-solid-state symmetrical supercapacitors

Binbin Chang\*, Lei Wang, Weiwei Shi, Yuting Chai, Shouren Zhang, Baocheng Yang\*,

Henan Provincial Key Laboratory of Nanocomposites and Applications, Institute of Nanostructured Functional Materials, Huanghe Science and Technology College, Zhengzhou, Henan 450006, China

*\*Corresponding author. Tel. Fax: +86 571 87541018.*

*E-mail address: [binbinchang@infm.hhstu.edu.cn](mailto:binbinchang@infm.hhstu.edu.cn) (B. Chang):*

*[baochengyang@infm.hhstu.edu.cn](mailto:baochengyang@infm.hhstu.edu.cn) (B. Yang)*

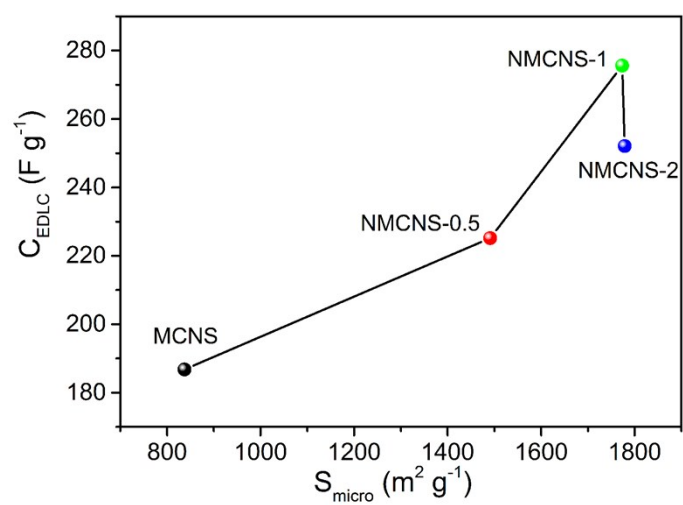

**Fig. S1** The dependence of  $C_{EDLC}$  on microporosity

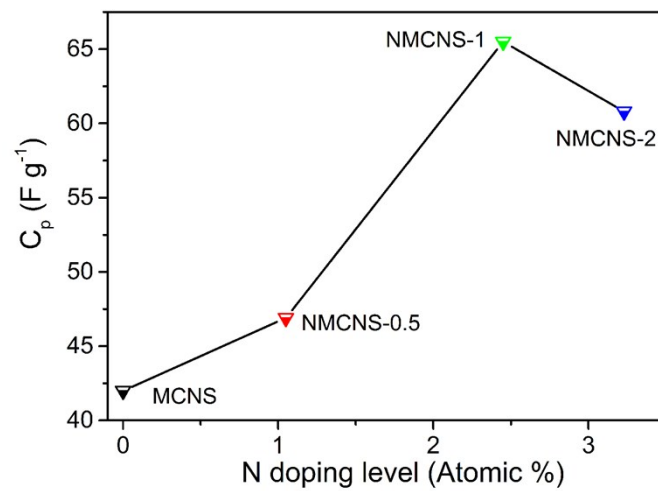

**Fig. S2** The relationship between  $C_p$  and the doping level of N/O species

**Table S1** XPS analysis of the MCNS and NMCNS samples

| Sample    | XPS analysis (atom%) |      |       |
|-----------|----------------------|------|-------|
|           | C                    | N    | O     |
| MCNS      | 69.79                | —    | 30.21 |
| NMCNS-0.5 | 75.52                | 1.05 | 23.43 |
| NMCNS-1   | 81.74                | 2.46 | 15.80 |
| NMCNS-2   | 87.92                | 3.32 | 8.86  |

**Table S2** The comparison of electrochemical capacitive performance of NMCNS-1 with reported carbon-based electrode materials

| Materials                                       | Capacitance (F g <sup>-1</sup> ) | Current density       | Electrolyte                        | Energy density (Wh kg <sup>-1</sup> ) | Power density (W kg <sup>-1</sup> ) | Electrolyte                           | Ref.      |
|-------------------------------------------------|----------------------------------|-----------------------|------------------------------------|---------------------------------------|-------------------------------------|---------------------------------------|-----------|
| Sorghum stalk based porous carbons              | 216.5                            | 0.5 A g <sup>-1</sup> | 2 M KOH                            | 9.77                                  | 225.35                              | 0.5 M Na <sub>2</sub> SO <sub>4</sub> | 1         |
| N,O co-doped highly porous carbon microflakes   | 278                              | 1 A g <sup>-1</sup>   | 2 M H <sub>2</sub> SO <sub>4</sub> | 9.5                                   | 500                                 | 2 M H <sub>2</sub> SO <sub>4</sub>    | 2         |
| N-doped yolk-shell hollow mesoporous carbon     | 169                              | 1 A g <sup>-1</sup>   | 1 M H <sub>2</sub> SO <sub>4</sub> | 7.6                                   | —                                   | 1 M H <sub>2</sub> SO <sub>4</sub>    | 3         |
| S, N co-doped porous carbon sheets              | 275                              | 0.5 A g <sup>-1</sup> | 6 M KOH                            | 7.8                                   | 250                                 | 6 M KOH                               | 4         |
| Porous graphitic biomass carbon                 | 222                              | 0.5 A g <sup>-1</sup> | KOH/PVA                            | 6.68                                  | 100.2                               | KOH/PVA                               | 5         |
| torreya grandis shell-derived porous carbon     | 290.1                            | 0.5 A g <sup>-1</sup> | 6 M KOH                            | 13.5                                  | 360.1                               | 0.5 M Na <sub>2</sub> SO <sub>4</sub> | 6         |
| Biomass-derived activated carbon materials      | 156                              | 0.5 A g <sup>-1</sup> | 1 M H <sub>2</sub> SO <sub>4</sub> | 7.8                                   | 150.2                               | 1 M H <sub>2</sub> SO <sub>4</sub>    | 7         |
| Oily sludge-derived hierarchical porous carbons | 348.1                            | 0.5 A g <sup>-1</sup> | 6 M KOH                            | 7.22                                  | 100                                 | KOH/PVA                               | 8         |
| Biomass-based N-doped porous carbon nanosheet   | 240.7                            | 1 A g <sup>-1</sup>   | 6 M KOH                            | 10.2                                  | 351                                 | KOH/PVA                               | 9         |
| N-self-doped carbon nanofiber aerogels          | 224                              | 0.5 A g <sup>-1</sup> | 2 M H <sub>2</sub> SO <sub>4</sub> | 5.7                                   | 125                                 | KOH/PVA                               | 10        |
| NMCNS-1                                         | 356                              | 0.5 A g <sup>-1</sup> | 6 M KOH                            | 16.3                                  | 180.1                               | 0.5 M Na <sub>2</sub> SO <sub>4</sub> | This work |
|                                                 |                                  |                       |                                    | 11.1                                  | 102.5                               | KOH/PVA                               |           |

## References

- [1] G. Ma, F. Hua, K. Sun, Z. Zhang, E. Feng, H Peng and Z. Lei, Porous carbon derived from sorghum stalk for symmetric supercapacitors, *RSC Adv.*, 2016, 6, 103508–103516.
- [2] F. Ma, J. Wan, G. Wu and H. Zhao, Highly porous carbon microflakes derived from catkins for high-performance supercapacitors, *RSC Adv.*, 2015, 5, 44416–44422.
- [3] C. Liu, J. Wang, J. Li, M. Zeng, R. Luo, J. Shen, X. Sun, W. Han, Synthesis of N-doped hollow-structured mesoporous carbon nanospheres for high-performance supercapacitors, *ACS Appl. Mater. Interfaces* 2016, 8, 7194–7204.
- [4] T. Wei, X. Wei, L. Yang, H. Xiao, Y. Gao, H. Li, A one-step moderate-explosion assisted carbonization strategy to sulfur and nitrogen dual-doped porous carbon nanosheets derived from camellia petals for energy storage, *J. Power Sources*, 2016, 331, 373–381.
- [5] Y. Gong, D. Li, C. Luo, Q. Fu, C. Pan, Highly porous graphitic biomass carbon as advanced electrode materials for supercapacitors, *Green Chem.*, 2017, 19, 4132–4140.
- [6] H. Xuan, G. Lin, F. Wang, J. Liu, X. Dong, F. Xi, Preparation of biomass-activated porous carbons derived from *torreya grandis* shell for high-performance supercapacitor, *J. Solid State Electrochem.*, 2017, 8, 2241–2249.
- [7] N. Sudhan, K. Subramani, M. Karnan, N. Ilayaraja, M. Sathish, Biomass-derived activated porous carbon from rice straw for a high-energy symmetric supercapacitor in aqueous and non-aqueous electrolytes, *Energy Fuels* 2017, 31, 977–985.
- [8] X. Li, K. Liu, Z. Liu, Z. Liu, Z. Wang, B. Li, D. Zhang, Hierarchical porous carbon from hazardous waste oily sludge for all-solid-state flexible supercapacitor, *Electrochimica Acta*, 2017, 240, 43–52.
- [9] M. F. Cheng, D. Yu, X. Z. Zheng, X. P. Dong, Biomass based N-doped hierarchical porous carbon nanosheets for all-solid-state supercapacitors, *Journal of Energy Storage*, 2019, 21, 105–112.
- [10] H. Chen, T. Liu, J. Mou, W. Zhang, Z. Jiang, J. Liu, J. Huang, M. Liu, Free-standing N-self-doped carbon nanofiber aerogels for high-performance all-solid-state supercapacitors, *Nano Energy*, 2019, 63, 103836.
